# Supplementary material for: Investigation of Salt Tolerance Mechanisms Across a Root Developmental Gradient in Almond Rootstocks
Source: PubMed Central journal article supplement (PMC7813803; doi:10.3389/fpls.2020.595055), 2021-01-05
Supplement: Data_Sheet_1.pdf [file Data_Sheet_1.pdf]

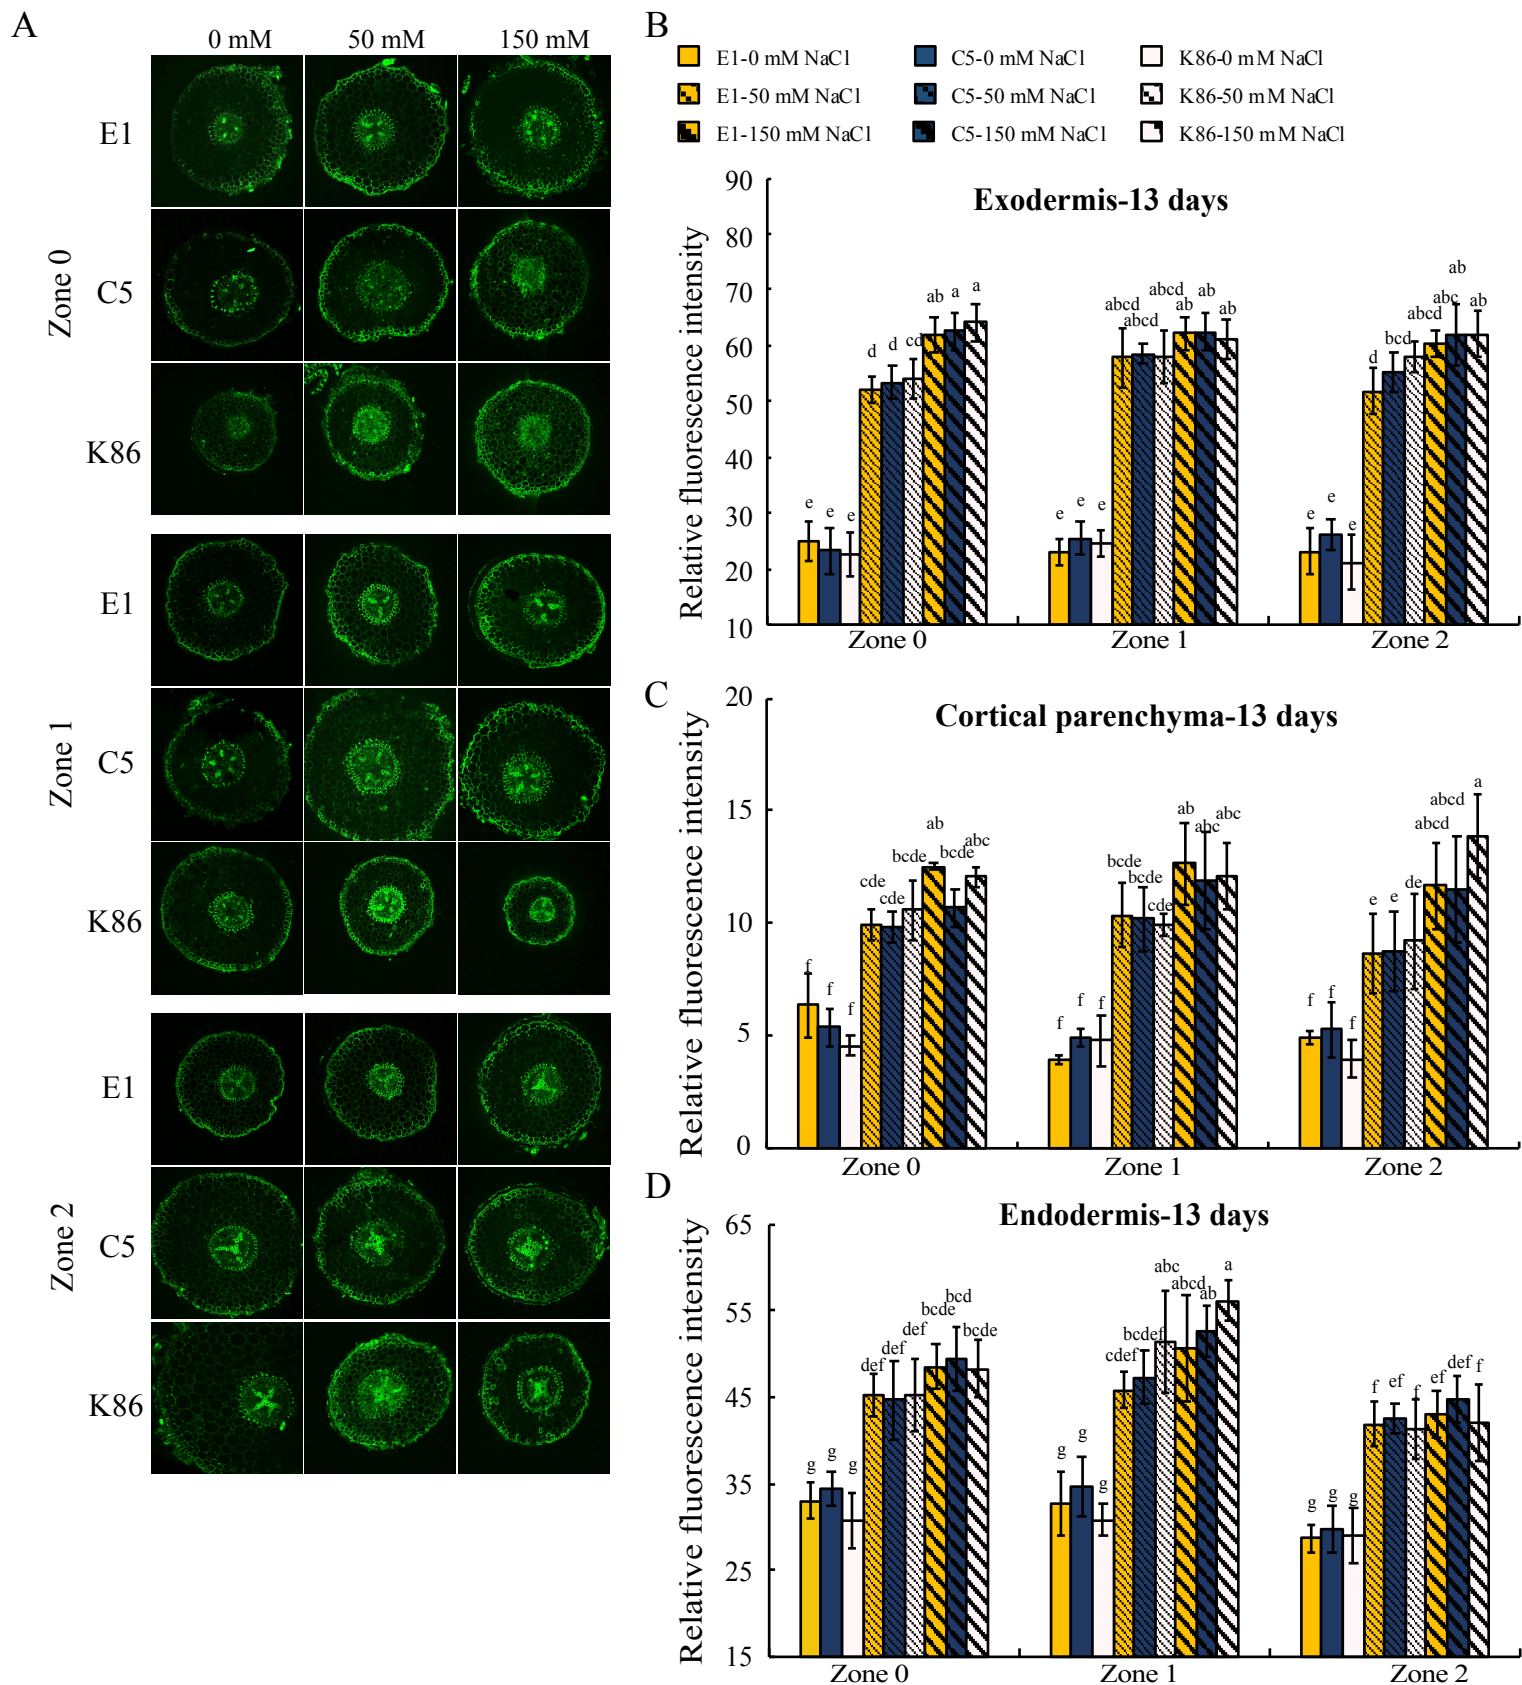

Supplemental Figure. E1 shows lower sodium accumulation under salinity stress compared with C5 and K86. (A) Representative images of CoroNa Green staining in the different root developmental zones in E1, C5 and K86 treated with 0mM, 50 mM, 150 mM NaCl for 13 days. Scale Bars, 100 $\mu$ m. (B) Quantification of sodium signal in the exodermis, (C) cortical parenchyma, and (D) endodermis shows lower fluorescent signal, etc. Values are means  $\pm$  SE (n = 15). Different lowercase letters indicate significant differences at P < 0.05, three-way ANOVA.

Supplemental Table 1. Primer sequences used in the RT-qPCR.

| Gene          | Primer direction | 5'- 3' sequence            |
|---------------|------------------|----------------------------|
| <i>ACTIN2</i> | sense            | ATCATGAAGTGTGATGTGGATAT    |
| <i>ACTIN2</i> | antisense        | ACCTTAATCTTCATGCTGCTTGG    |
| <i>NHX1</i>   | sense            | ACGTTGCAGGTGCTCAAT         |
| <i>NHX1</i>   | antisense        | CACCACAGATGTAGCATCGTTA     |
| <i>NHX2</i>   | sense            | TGCTAACCACTGGAGGGA         |
| <i>NHX2</i>   | antisense        | TGGAACCCGGCATTGAAA         |
| <i>SOS1</i>   | sense            | GGCATTTCGAATTTGGGCAAA      |
| <i>SOS1</i>   | antisense        | TTTGTACCATACACCTCTTTATTTGG |
| <i>SOS2</i>   | sense            | GACCTGAAGCCCGAGAATC        |
| <i>SOS2</i>   | antisense        | AAGACCAACTCCTTGTCAGG       |
| <i>SOS3</i>   | sense            | GAAACACCCTTTACAGTGAATGAAG  |
| <i>SOS3</i>   | antisense        | GAAATTCTTCCTTGTGGATAAGCC   |
| <i>HKT1</i>   | sense            | TCTTTCATGCCAACCTTTCT       |
| <i>HKT1</i>   | antisense        | GCCTAGTAGTTCTTGGCTTTGT     |
| <i>SAL1</i>   | sense            | CTCTCCTCTGCCAGAAGGTA       |
| <i>SAL1</i>   | antisense        | CAAGAGCCTGTGAACCGTAA       |
| <i>P5CS1</i>  | sense            | CGCATCGTTCTCAAGGTTG        |
| <i>P5CS1</i>  | antisense        | TTCAACTCCTTGAGCTGCTC       |
| <i>ASFT1</i>  | sense            | AGCCCACCACTGCCAAAA         |
| <i>ASFT1</i>  | antisense        | CATCTTGAACCAGCCCAACT       |
| <i>KCS1</i>   | sense            | GTGGGAGATGGATTGAGTGAAG     |
| <i>KCS1</i>   | antisense        | GCTGGAGTGTAGTGGTAGAAGCA    |
| <i>C3H</i>    | sense            | ACAAGAGTGGTGGTGCCAAG       |
| <i>C3H</i>    | antisense        | ACGGTTATGGCTGTGGTGTC       |
